# Supplementary material for: Electrogenerated chemiluminescence of a Ru(bpy)32+/arginine system: a specific and sensitive detection of acetaminophen
Source: Royal Society of Chemistry journal article supplement (doi:10.1039/d1ra09371a), 2022-01-01
Supplement: d1ra09371a1.pdf [file d1ra09371a1.pdf]

## Supplemental Material

### **Electrogenerated Chemiluminescence of Ru(bpy)<sub>3</sub><sup>2+</sup>/Arginine System: A Specific and Sensitive Detection of Acetaminophen**

Yi Xiao<sup>1,4</sup>, Guofang Wang<sup>1</sup>, Haomin Yi<sup>1</sup>, Suhua Chen<sup>3</sup>, Qinyu Wu<sup>1</sup>, Siyi Zhang<sup>1</sup>,  
Kexin Deng<sup>1</sup>, Simeng Zhang<sup>1</sup>, Zi-Qi Shi<sup>2\*</sup>, Xiaoping Yang<sup>1\*</sup>

1. Key Laboratory of Study and Discovery of Small Targeted Molecules of Hunan Province, Department of Pharmacy, School of Medicine, Hunan Normal University, Changsha 410013, Hunan, China

2. Affiliated Hospital of Integrated Traditional Chinese and Western Medicine, Nanjing University of Chinese Medicine, Nanjing 210028, Jiangsu, China

3. Hunan Provincial Maternal and Child Health Care Hospital, Changsha 410008, Hunan, China

4. John A. Paulson School of Engineering and Applied Sciences, Harvard University, Cambridge, MA 02138, USA.

\*Corresponding authors. Email address: [Xiaoping.Yang@hunnu.edu.cn](mailto:Xiaoping.Yang@hunnu.edu.cn);  
[shiziqi47@126.com](mailto:shiziqi47@126.com).

## Table of Content

S1. Morphology of MPS

S2. CVs of  $\text{Ru}(\text{bpy})_3^{2+}/\text{Arg}$  system

S3. Mechanism of  $\text{Ru}(\text{bpy})_3^{2+}/\text{TPrA}$  system

S4. CVs of  $\text{Ru}(\text{bpy})_3^{2+}/\text{DBAE}$  system

S5. Mechanism of  $\text{Ru}(\text{bpy})_3^{2+}/\text{DBAE}$  system

S6. Specificity of MPS-ECL sensor

S7. Repeatability and temperature stability of ECL system

Table S1. Analytical results for different co-reactants on MPS-ECL sensor

Table S2. Analytical results for Ace by different ECL systems

Table S3. Analytical results for Arg by MPS-ECL sensor in biological fluids

Table S4. Analytical results for Ace by MPS-ECL sensor in biological fluids

Table S5. Analytical results for Ace by HPLC in biological fluids

Table S6. Ace contents in biological fluids by HPLC and MPS-ECL sensor

## S1. Morphology of MPS

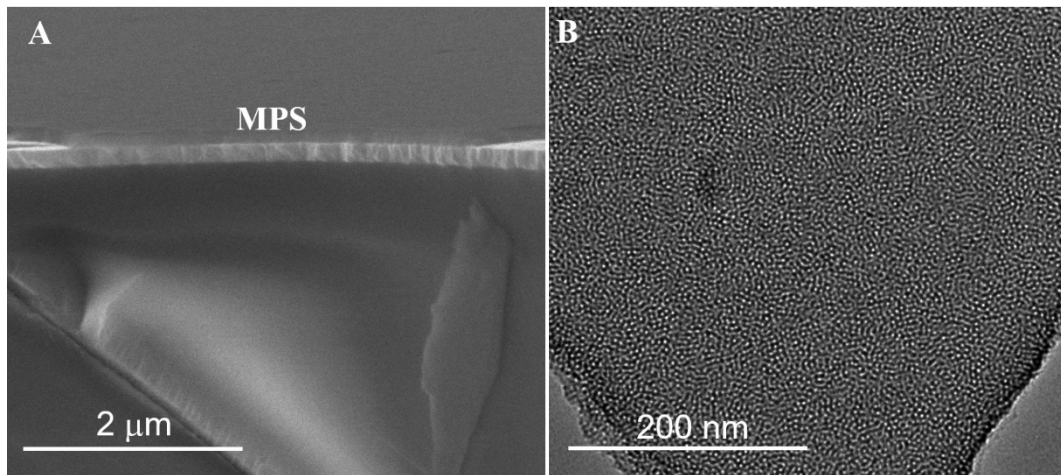

**Fig. S1. Morphology of MPS.** (A) SEM image shows that MPS is above the indium tin oxide glass. (B) TEM image shows MPS is vertically aligned nanochannels (indicated as white pores).

## S2. CVs of Ru(bpy)<sub>3</sub><sup>2+</sup>/Arg system

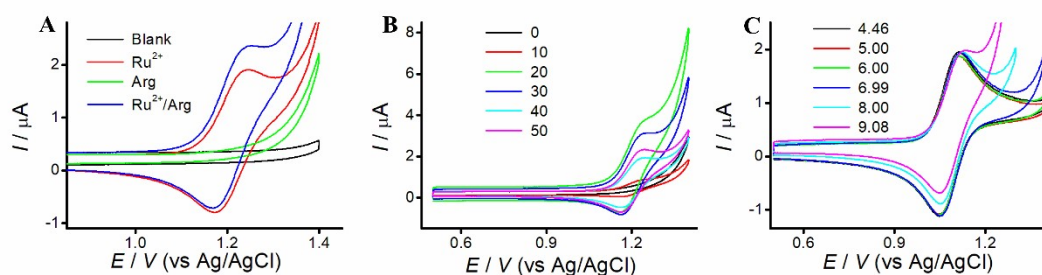

**Fig. S2 CVs of Ru(bpy)<sub>3</sub><sup>2+</sup>/Arg system.** A. CVs of 50 μM Ru(bpy)<sub>3</sub><sup>2+</sup> and 50 μM Arg. B. CVs of different concentrations of Ru(bpy)<sub>3</sub><sup>2+</sup> with 50 μM Arg. C. CVs of different pH with 50 μM Ru(bpy)<sub>3</sub><sup>2+</sup> and 50 μM Arg. Scan rate: 0.05 V s<sup>-1</sup>.

### S3. Mechanism of $\text{Ru}(\text{bpy})_3^{2+}/\text{TPrA}$ system

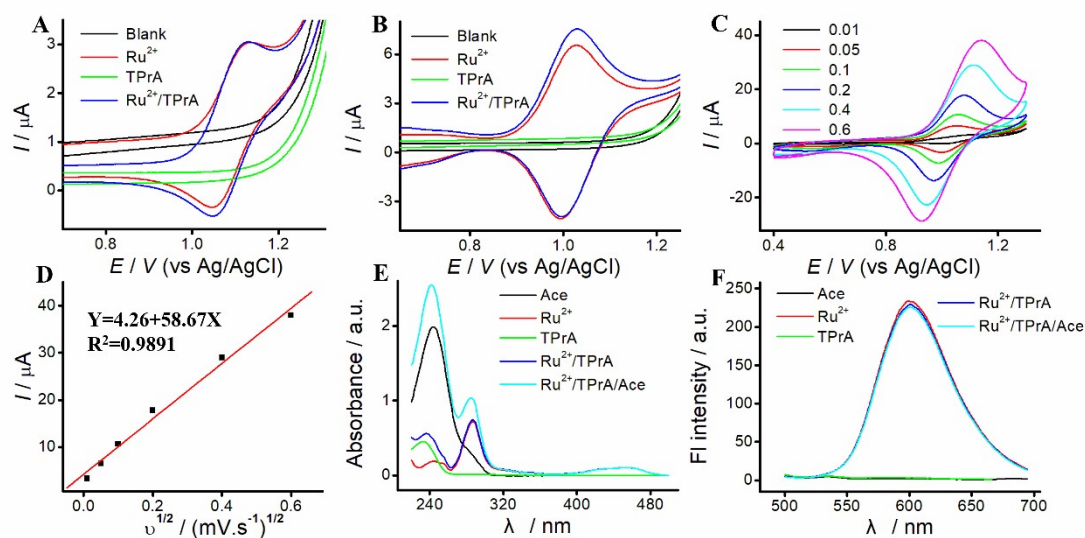

**Fig. S3 Mechanism of  $\text{Ru}(\text{bpy})_3^{2+}/\text{TPrA}$  system.** A. CVs of different solutions at ITO electrode.

Scan rate:  $0.05 \text{ V s}^{-1}$ . B. CVs of different solutions at MPS electrode. C. CVs of different scan rates with  $50 \mu\text{M}$   $\text{Ru}(\text{bpy})_3^{2+}$  and  $50 \mu\text{M}$  TPrA at ITO electrode. D. Linear plot of oxidation peak current intensity vs.  $\nu^{1/2}$ . E. UV-vis absorption of different solutions. F. Fluorescence spectra of different solutions ( $\lambda_{\text{exc}} = 452 \text{ nm}$ ).

#### S4. CVs of Ru(bpy)<sub>3</sub><sup>2+</sup>/DBAE system

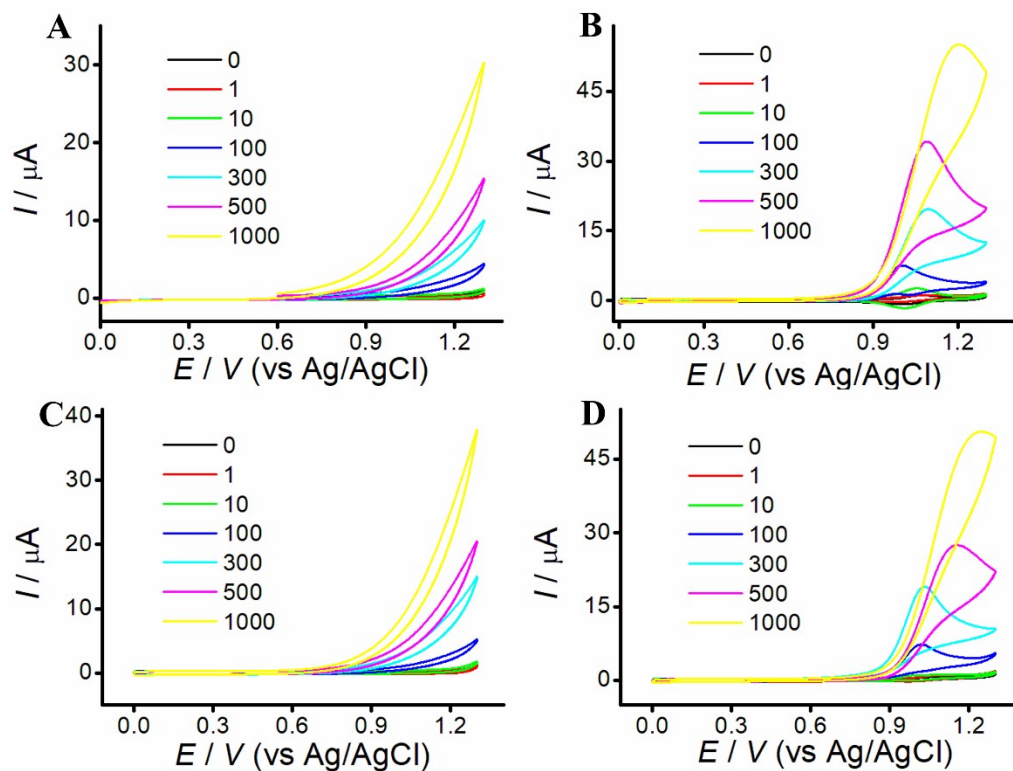

**Fig. S4 CVs of Ru(bpy)<sub>3</sub><sup>2+</sup>/DBAE system.** A. CVs of different concentration of Ace (0.1 M PBS, pH 9.21) at MPS electrode with scan rate of 0.05 V/s. B. CVs of different concentration of Ace with 50  $\mu\text{M}$  Ru(bpy)<sub>3</sub><sup>2+</sup> at MPS electrode. C. CVs of different concentration of Ace with 50  $\mu\text{M}$  DBAE at MPS electrode. D. CVs of different concentration of Ace with 50  $\mu\text{M}$  Ru(bpy)<sub>3</sub><sup>2+</sup> and 50  $\mu\text{M}$  DBAE at MPS electrode.

## S5. Mechanism of $\text{Ru}(\text{bpy})_3^{2+}/\text{DBAE}$ system

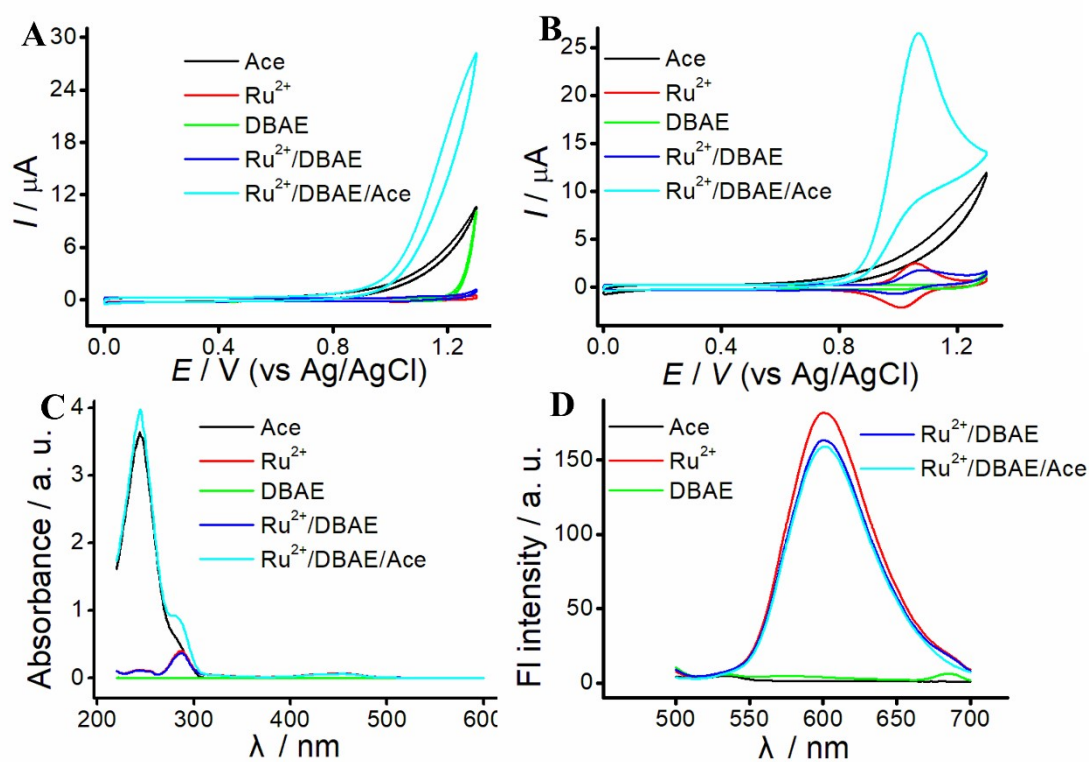

**Fig. S5 Mechanism of  $\text{Ru}(\text{bpy})_3^{2+}/\text{DBAE}$  system.** A. CVs of different solutions at ITO electrode with scan rate of 0.05 V/s. B. CVs of different solutions at MPS electrode. C. UV-vis absorption of different solutions. D. Fluorescence spectra of different solutions ( $\lambda_{\text{exc}} = 452 \text{ nm}$ ).

## S6. Specificity of MPS-ECL sensor

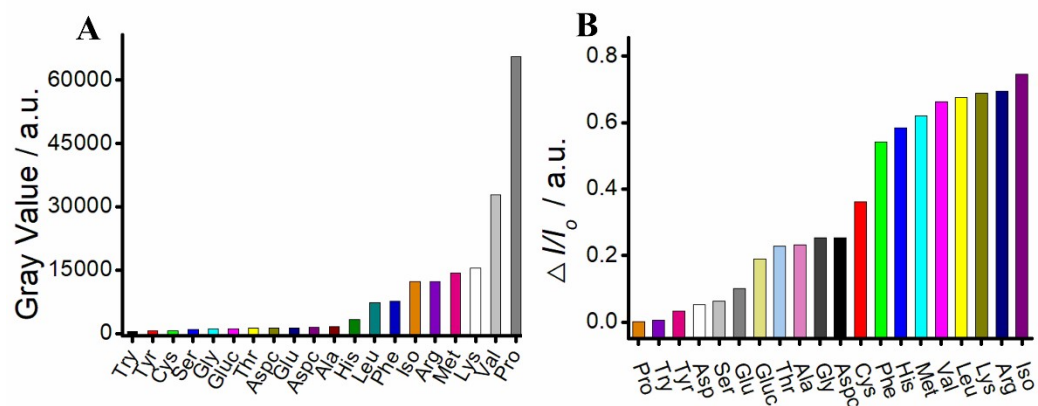

**Fig. S6. Specificity of the MPS-ECL sensor.** (A) ECL intensity of 20 types of amino acids on MPS-ECL sensor in PBS containing  $Ru(bpy)_3^{2+}$ . (B) ECL quenching effect of 20 types of amino acids on MPS-ECL sensor in  $Ru(bpy)_3^{2+}/Ace$  system.



## S7. Repeatability and temperature stability of ECL system

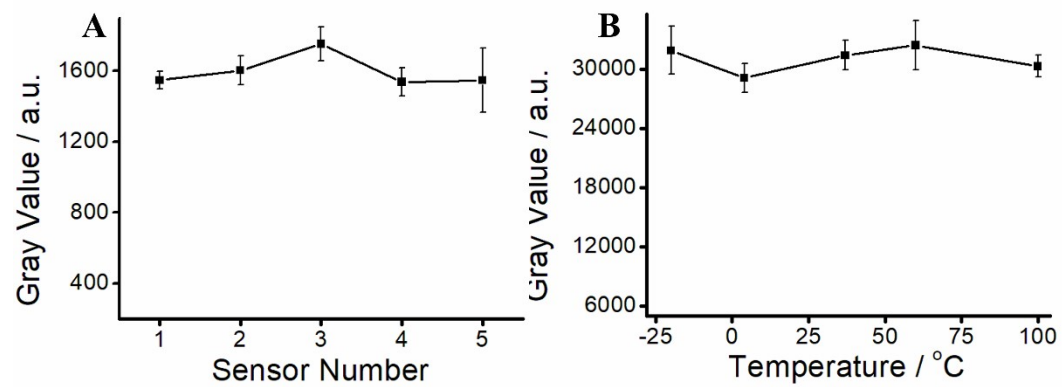

**Fig. S7** A. Repeatability of ECL system. B. Temperature stability of ECL system.

**Table S1. Analytical results for different co-reactants on MPS-ECL sensor**

Table S1. Analytical results for different co-reactants on MPS-ECL sensor

| Different co-reactants | Fitting equation     | Dynamic range ( $\mu\text{M}$ ) | LOD ( $\mu\text{M}$ ) | R <sup>2</sup> |
|------------------------|----------------------|---------------------------------|-----------------------|----------------|
| Arg                    | $Y=88.55X+4653.91$   | 1–700                           | 0.590                 | 0.9974         |
| TPrA                   | $Y=1811.79X+4564.30$ | 0.1–30                          | 0.023                 | 0.9839         |
| DBAE                   | $Y=3169.74X+3652.29$ | 0.5–20                          | 0.027                 | 0.9928         |

**Table S2. Analytical results for Ace by different ECL systems**

Table S2. Analytical results for Ace by different ECL systems

| Different ECL systems                    | Fitting equation     | LOD ( $\mu\text{M}$ ) | Dynamic range ( $\mu\text{M}$ ) | R <sup>2</sup> |
|------------------------------------------|----------------------|-----------------------|---------------------------------|----------------|
| Ru(bpy) <sub>3</sub> <sup>2+</sup> /Arg  | $Y=0.00202X-0.00907$ | 0.84                  | 1–500                           | 0.9828         |
| Ru(bpy) <sub>3</sub> <sup>2+</sup> /TPrA | $Y=0.0018X-0.5225$   | 8.08                  | 10–500                          | 0.9877         |
| Ru(bpy) <sub>3</sub> <sup>2+</sup> /DBAE | $Y=0.00176X-0.4190$  | 5.98                  | 10–500                          | 0.9611         |

**Table S3. Analytical results for Arg by MPS-ECL sensor in biological fluids**

Table S3. Analytical results for Arg by MPS-ECL sensor in biological fluids

| Biological fluids | Added ( $\mu\text{M}$ ) | Found ( $\mu\text{M}$ ) | Recovery (%) | RSD (%) |
|-------------------|-------------------------|-------------------------|--------------|---------|
| Human serum       | 500                     | 467.500                 | 93.50        | 0.58    |
| Human saliva      | 300                     | 283.350                 | 94.45        | 3.59    |

**Table S4. Analytical results for Ace by MPS-ECL sensor in biological fluids**

Table S4. Analytical results for Ace by MPS-ECL sensor in biological fluids

| Biological fluids | Added ( $\mu\text{M}$ ) | Found ( $\mu\text{M}$ ) | Recovery (%) | RSD (%) |
|-------------------|-------------------------|-------------------------|--------------|---------|
| Human serum       | 150                     | 163.832                 | 109.22       | 1.89    |
| Human saliva      | 50                      | 50.750                  | 101.5        | 2.60    |

**Table S5. Analytical results for Ace by HPLC in biological fluids**

Table S5. Analytical results for Ace by HPLC in biological fluids

| Fitting equation | Fitting equation   | Dynamic range ( $\mu\text{M}$ ) | LOD ( $\mu\text{M}$ ) | LOQ ( $\mu\text{M}$ ) | R <sup>2</sup> |
|------------------|--------------------|---------------------------------|-----------------------|-----------------------|----------------|
| Human serum      | $Y=41.355X-9.8885$ | 16–1649                         | 0.097                 | 0.195                 | 0.9996         |
| Human saliva     |                    |                                 | 0.039                 | 0.0474                |                |

**Table S6. Ace contents in biological fluids by HPLC and MPS-ECL sensor**

Table S6. Ace contents in biological fluids by HPLC and MPS-ECL sensor

| Biological fluids | MPS-ECL sensor                  |         | HPLC                            |         |
|-------------------|---------------------------------|---------|---------------------------------|---------|
|                   | Concentration ( $\mu\text{M}$ ) | RSD (%) | Concentration ( $\mu\text{M}$ ) | RSD (%) |
| Human serum       | 54.933                          | 2.09    | 48.740                          | 0.169   |
| Human saliva      | 50.750                          | 2.60    | 47.368                          | 0.563   |
